# Supplementary material for: Ternary organic solar cells with a phase-modulated surface distribution via the addition of a small molecular luminescent dye to obtain a high efficiency over 10.5%
Source: Royal Society of Chemistry journal article supplement (doi:10.1039/c8nr04335c), 2018-01-01
Supplement: c8nr04335c1.pdf [file c8nr04335c1.pdf]

## Supporting Information

Ternary organic solar cells with a phase-modulated surface distribution  
via the addition of a small molecular luminescent dye to obtain a high  
efficiency over 10.5%

Xiaoyang Du,<sup>a</sup> Hui Lin,<sup>\*a</sup> Xinwei Chen,<sup>a</sup> Silu Tao,<sup>\*a</sup> Caijun Zheng,<sup>a</sup> and Xiaohong  
Zhang<sup>b</sup>

<sup>a</sup> School of Optoelectronic Science and Engineering, University of Electronic Science  
and Technology of China (UESTC), Chengdu 610054, P. R. China

<sup>b</sup> Institute of Functional Nano & Soft Materials (FUNSOM), Soochow University,  
Suzhou 215123, P. R. China

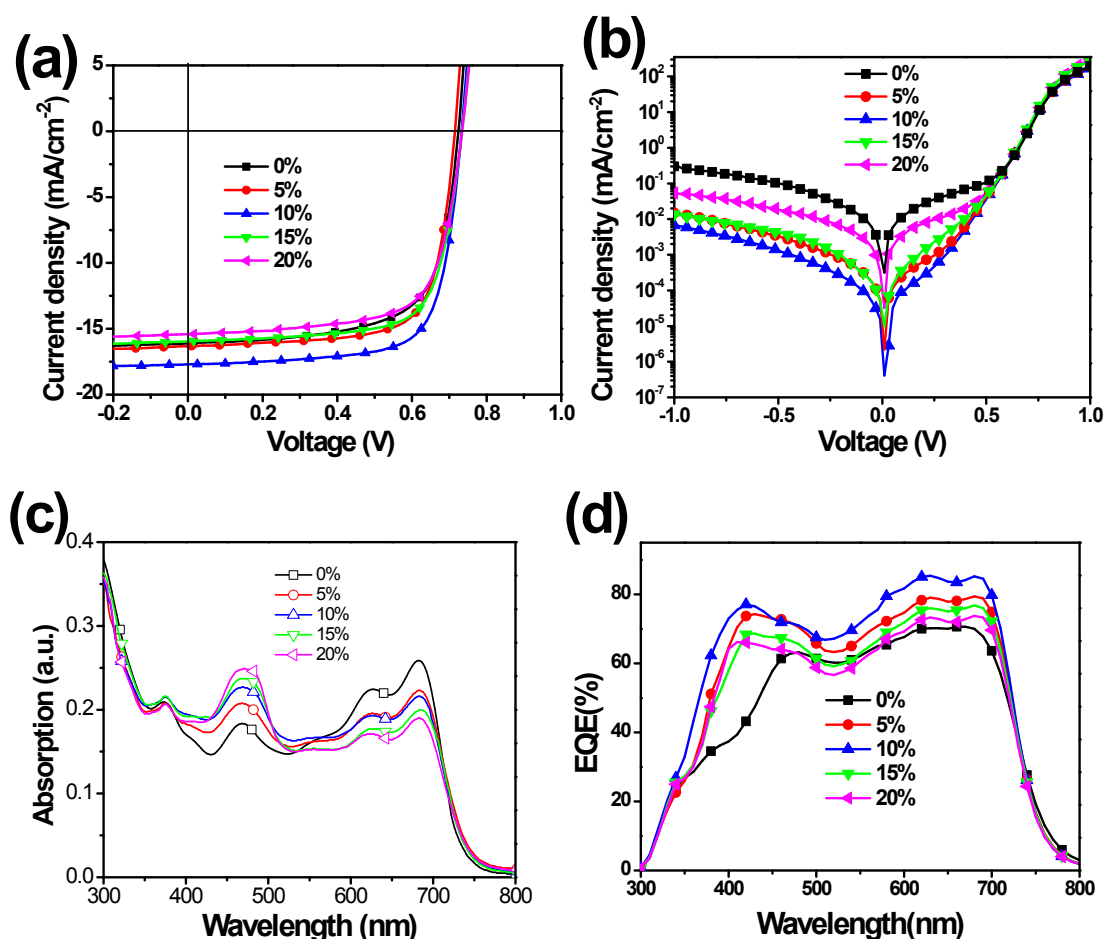

Figure S1. (a) Current-voltage (J-V) characteristics; (b) Dark J-V curves; (c) Absorption spectra and (d) EQE spectra of PTB7/C5/PC<sub>71</sub>BM blends with different doping amounts of C5.

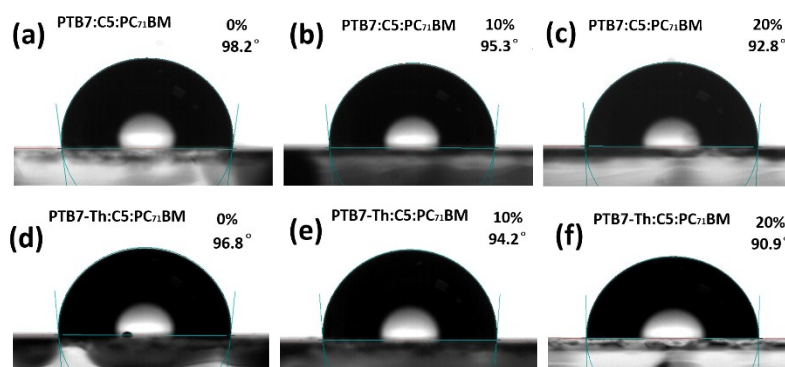

**Figure S2.** Photographs of water contact angle (WCA) on the ITO substrate surfaces coated with “binary” and “ternary” active layer blend films. (a) PTB7/ PC<sub>71</sub>BM = 1:1.5; (b) PTB7/C5/ PC<sub>71</sub>BM = 0.9:0.1:1.5; (c) PTB7/C5/ PC<sub>71</sub>BM = 0.8:0.2:1.5; (d) PTB7-Th/C5/ PC<sub>71</sub>BM = 0.9:0.1:1.5; (e) PTB7-Th/C5/ PC<sub>71</sub>BM = 0.8:0.2:1.5; (f) PTB7-Th/C5/ PC<sub>71</sub>BM = 0.8:0.2:1.5.

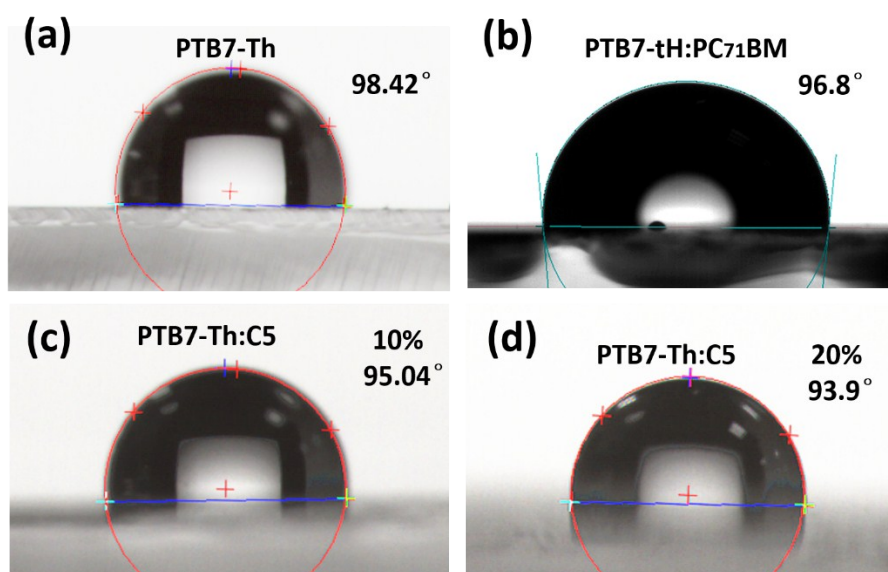

**Figure S3.** WCA images of (a) pure PTB7-Th film; (b) PTB7-Th:PC<sub>71</sub>BM blend film; The binary blend films of (c) PTB7/C5 = 0.9:0.1 and (d) PTB7/C5 = 0.8:0.2.

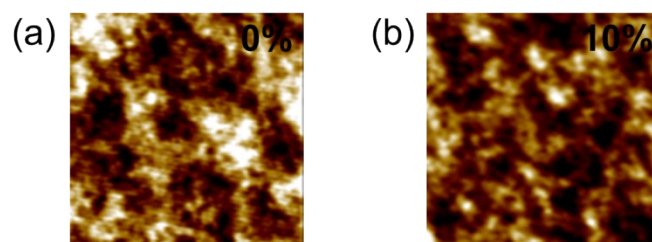

**Figure S4.** The enlarged parts of the AFM images, (a) is the control film without any additive; (b) is 10% C545T doped ternary film.

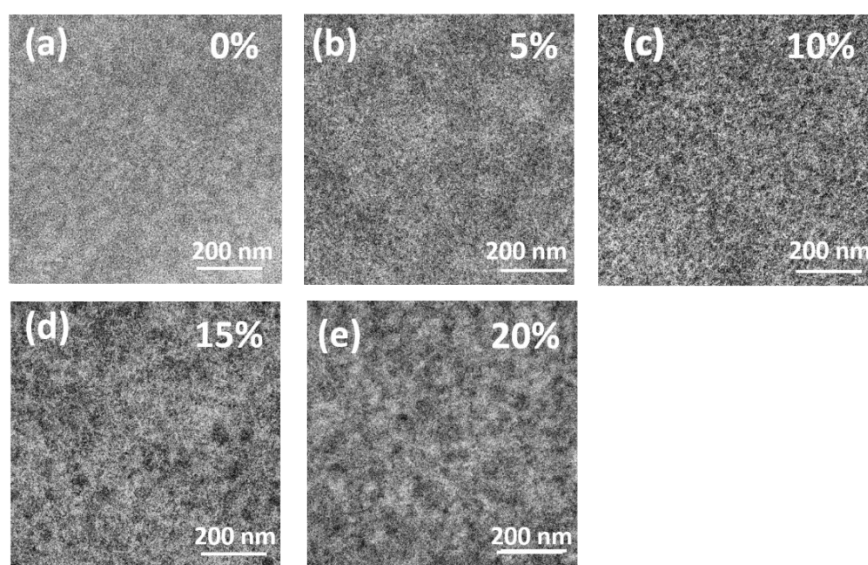

**Figure S5.** Transmission electron microscopy (TEM) images for the active-layer films with different amounts of C5. (a) PTB7/ PC<sub>71</sub>BM = 1:1.5; (b) PTB7/C5/ PC<sub>71</sub>BM = 0.95:0.05:1.5; (c) PTB7/C5/ PC<sub>71</sub>BM = 0.9:0.1:1.5; (d) PTB7/C5/ PC<sub>71</sub>BM = 0.85:0.15:1.5; (e) PTB7/C5/ PC<sub>71</sub>BM = 0.8:0.2:1.5.

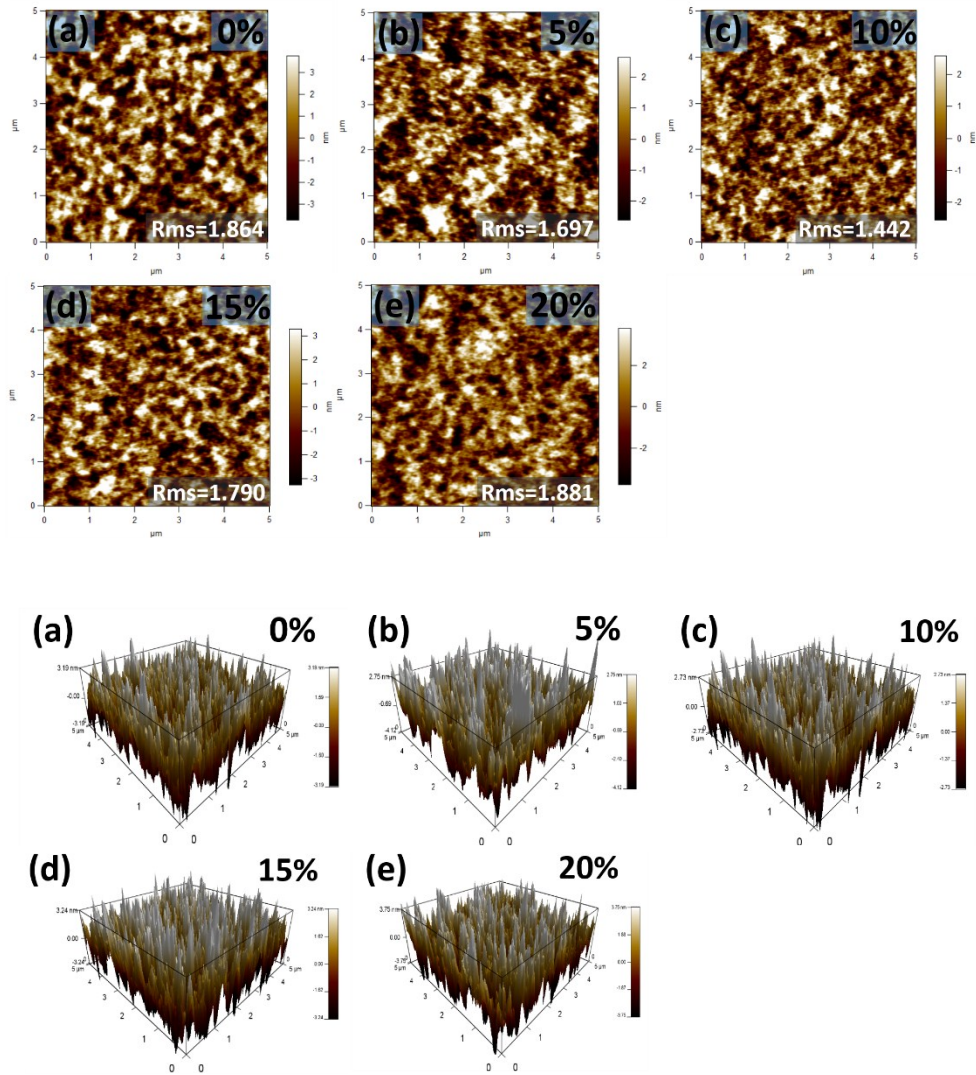

**Figure S6.** 2D and 3D atomic force microscope (AFM) images for the binary and ternary-blended films (5×5 μm). (a) PTB7: PC<sub>71</sub>BM = 1:1.5; (b) PTB7/C5/PC<sub>71</sub>BM = 0.95:0.05:1.5; (c) PTB7/C5/ PC<sub>71</sub>BM = 0.9:0.1:1.5; (d) PTB7/C5/ PC<sub>71</sub>BM = 0.85:0.15:1.5; (e) PTB7/C5/ PC<sub>71</sub>BM = 0.8:0.2:1.5.

**Table S1.** Summary for the contact angle of two liquids and surface energy for different active layer materials.

| Materials           | Contact angle |         | Surfaces energy |
|---------------------|---------------|---------|-----------------|
|                     | Water         | Ethanol |                 |
| C5                  | 72.15°        | 48.50°  | 34.96 mN/m      |
| PC <sub>71</sub> BM | 84.45°        | 56.98°  | 32.78 mN/m      |
| PTB7                | 100.47°       | 80.78°  | 17.5 mN/m       |
| PTB7-Th             | 98.42°        | 82.43°  | 15.57 mN/m      |
